# Supplementary material for: Ru nanoparticles confined in carbon nanotubes: supercritical CO2 assisted preparation and improved catalytic performances in hydrogenation of d-glucose
Source: Royal Society of Chemistry journal article supplement (doi:10.1039/c3ra45509b), 2014-01-01
Supplement: c3ra45509b.pdf [file c3ra45509b.pdf]

## Electronic Supplementary Information for

# Ru nanoparticles confined in carbon nanotubes: supercritical CO<sub>2</sub> assisted preparation and improved catalytic performances in hydrogenation of D-glucose

Sankui Xu,<sup>a,b</sup> Peng Zhang,<sup>a</sup> Hongbian Li,<sup>c</sup> Huijuan Wei,<sup>a</sup> Limin Li,<sup>\*a</sup> Baojun Li<sup>\*ad</sup> and Xiangyu Wang<sup>a</sup>

College of Chemistry and Molecular Engineering, Zhengzhou University, Zhengzhou 450001, P R China

\*Corresponding author E-mail: lilm@zzu.edu.cn and lbjfc1@zzu.edu.cn.

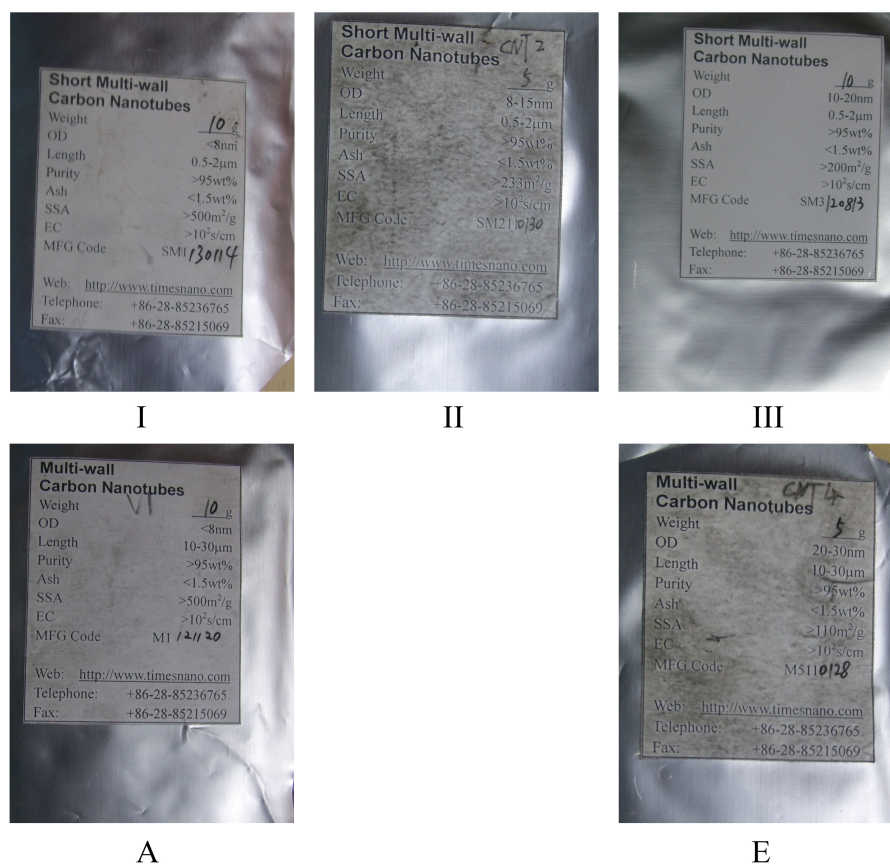

Figure S1. The structure and purity information of carbon nanotubes on packages.

Table S1. Ru concentration in residual solution.

| entry                        | Ru concentration (mg L <sup>-1</sup> ) |        |        |        |
|------------------------------|----------------------------------------|--------|--------|--------|
|                              | 1.0                                    | 30.0   | 60.0   | 120.0  |
| Ru/CNT- I                    | 0.0351                                 | 0.0286 | 0.0203 | 0.0108 |
| Ru/CNT- I (H <sub>2</sub> O) | 0.0774                                 | 0.0309 | 0.0275 | 0.0187 |
